# Supplementary material
Source: MDPI journal article supplement (https://www.mdpi.com/1424-2818/13/6/257)
Supplement: s1 [file s1]

## Supporting information

Table S1: Characteristics of the 21 microsatellite loci that were selected for use in characterizing the genetic variability of the Dibbler, *Parantechinus apicalis*.

| Locus   | Species                       | Nature of repeat     | Size (bp) | Multiplex | Cycle | DNA (10ng/uL) | PCR Anneal Temp (C°) | Primer sequence (5' - 3')                              | References |
|---------|-------------------------------|----------------------|-----------|-----------|-------|---------------|----------------------|--------------------------------------------------------|------------|
| pPa2D4  | <i>Parantechinus apicalis</i> | NA                   | 193-203   | 2         | x35   | 1             | 56                   | CAATCTGTCAATAACCTTCCCCC<br>TGGAGGACCTCCAGAAAGTTAGC     | [47]       |
| pPa2A12 | <i>P. apicalis</i>            | (GT)21               | 103-133   | 2         | x35   | 1             | 56                   | ATCCTGGAGAAGAGAAGACCTGC<br>GTGGCTTATTCCATGCTTGTAGG     | [47]       |
| pPa2B10 | <i>P. apicalis</i>            | (GT)23               | 172-182   | 4         | x40   | 1             | 58                   | GAGAAAAAATATGCACAAGCACC<br>AAGGAGAAAAAGTTAATACCATCCC   | [47]       |
| pPa7A1  | <i>P. apicalis</i>            | (GAA)85              | 298-315   | 2         | x35   | 1             | 56                   | CTCCACCTCTCTAGACATGACCC<br>TTTACTTGCTTTGTACTAGAGGCC    | [47]       |
| pPa7H9  | <i>P. apicalis</i>            | NA                   | 159-173   | 2         | x35   | 1             | 56                   | AAATAACAACAATAGTTCATTATGT<br>ATTATTTGCTTACTTTGAAGATATA | [47]       |
| pPa9D2  | <i>P. apicalis</i>            | (GT)4AT(GT)11GC(GT)3 | 94-103    | 4         | x40   | 1             | 58                   | TGGAAAGCAATATGGTAGAAGTGTG<br>TTCAAGGGTTCAAAACAACATTCTT | [47]       |
| pPa1B10 | <i>P. apicalis</i>            | (GAAA)46             | 197-236   | 2         | x35   | 1             | 56                   | AAGGAGGGATGGAGGAGGAA<br>CAGTGTTCTGAATGACATTGGCTAC      | [47]       |
| pPa4B3  | <i>P. apicalis</i>            | (GT)15               | 125-135   | 4         | x40   | 1             | 58                   | GAAGGACAACATTCCCGATTGT<br>CCTACCCTAATTGCAAATCCTTTC     | [47]       |
| pPa8F10 | <i>P. apicalis</i>            | (AC)19               | 91-103    | 4         | x40   | 1             | 58                   | CAATCTAGGAATCACAGAACTCCC<br>TTTGCATCTACCTAATTGCGTGT    | [47]       |
| pDG1A1  | <i>Dasyurus geoffroii</i>     | (AG)20               | 208-224   | 3         | x35   | 1             | 54                   | ATTTGCTTCTTGCTCCCTACAGC<br>TTTCACTCCTTCTGAGTTTATCACC   | [48]       |
| pDG1H3  | <i>D. geoffroii</i>           | (TG)17               | 190-204   | 4         | x40   | 1             | 58                   | GTGGATTGACACAATCAGAGTGG<br>GCAATTCCATCTTTATTGCATGC     | [48]       |
| pDG6D5  | <i>D. geoffroii</i>           | (AC)22               | 101-135   | 3         | x35   | 1             | 54                   | CCTCCAGACAAATGCAACC<br>TCTCTGAATTTACTGATAGTATCTTTGG    | [48]       |
| 3.1.2   | <i>Dasyurus spp.</i>          | (CA)18               | 177-185   | 3         | x35   | 1             | 54                   | AGGAACTTCACAAGTGTCGA<br>ATTAATGACTCATCTGTTGTTGG        | [49]       |

|        |                                  |                     |         |   |     |   |    |                                                  |      |
|--------|----------------------------------|---------------------|---------|---|-----|---|----|--------------------------------------------------|------|
| 3.3.1  | <i>Dasyurus spp.</i>             | (CA)20              | 130-152 | 3 | x35 | 1 | 54 | CAGCCCTTGAGTCTTGAGATT<br>CATACCACCCCAGGAGTTTC    | [49] |
| 3.3.2  | <i>Dasyurus spp.</i>             | (CA)21              | 156-172 | 1 | x35 | 2 | 46 | AATAGCAGAGACTCGATCC<br>AGCCTTTATTACCTGGGAAG      | [49] |
| 4.4.2  | <i>Dasyurus spp.</i>             | (CA)19              | 125-133 | 2 | x35 | 1 | 56 | GAAATCCAAGCTCATTTTAG<br>AATCAACTCTGGAATGCATC     | [49] |
| 4.4.10 | <i>Dasyurus spp.</i>             | (CA)29              | 219-242 | 3 | x35 | 1 | 54 | AATGCTAGATTTCCTCCC<br>CCTCACATTTCTGGAACTG        | [49] |
| Sh3o   | <i>Sarcophilus<br/>laniarius</i> | (CA)22              | 195-197 | 1 | x35 | 2 | 46 | CTCAATGCCAAAGGTATCTTC<br>CATAGTTCCAAATCACTCTCCAG | [50] |
| Sh6e   | <i>S. laniarius</i>              | (CA)6<br>(A)2(CA)18 | 166-181 | 3 | x35 | 1 | 54 | GATTCTAGAAGGGATAGCAAGC<br>GAACTCCATAGAAATGCACTG  | [50] |
| Aa4A   | <i>Antechinus<br/>agilis</i>     | NA                  | 162-174 | 1 | x35 | 2 | 46 | TTTGATCCTCAGAGACTTGAT<br>CCAAATCTACGTAAAATATCC   | [51] |
| Aa4J   | <i>A. agilis</i>                 | NA                  | 164-182 | 1 | x35 | 2 | 46 | TCTTCAGTCTCTCAATGAGTT<br>AGAACACTCTAACAACATCCT   | [52] |
